# Supplementary material
Source: Royal Society of Chemistry journal article supplement (doi:10.1039/d5ma01501d)
Supplement: d5ma01501d1.pdf [file d5ma01501d1.pdf]

## Supporting Information

### **A Multifunctional GaMOF–Cu<sub>2</sub>O–Integrated GelMA Hydrogel for Synergistic Antibacterial Activity and Tissue Regeneration**

*Hai Zhu<sup>1</sup>, Yu Sun, Yue Gao, Huan Liu, Xiaoming Tang\*, Feng Ji\**

#### **1. Supplementary Methods**

##### **Materials.**

Gelatin methacryloyl (GelMA), lithium phenyl-2,4,6-trimethylbenzoylphosphinate (LAP), Ga(NO<sub>3</sub>)<sub>3</sub>·5H<sub>2</sub>O, copper(I) oxide nanoparticles (Cu<sub>2</sub>O), MES buffer, PBS, and all cell culture reagents were purchased from commercial suppliers (Sigma-Aldrich, Aladdin, Gibco) and used without further purification. Ultrapure water (18.2 MΩ·cm) was used in all experiments. APC-labeled anti-CD197 antibody and PE-labeled anti-CD206 antibody were purchased from BioLegend (USA). The RNA Purification Kit, Color Reverse Transcription Kit, 2×Color SYBR Green qPCR Master Mix were purchased from EZBioscience. ELISA kits (TNF-α, IL-10) were purchased from Multi Science Biotech Co. (China).

## 2. Supplementary Tables and Figures

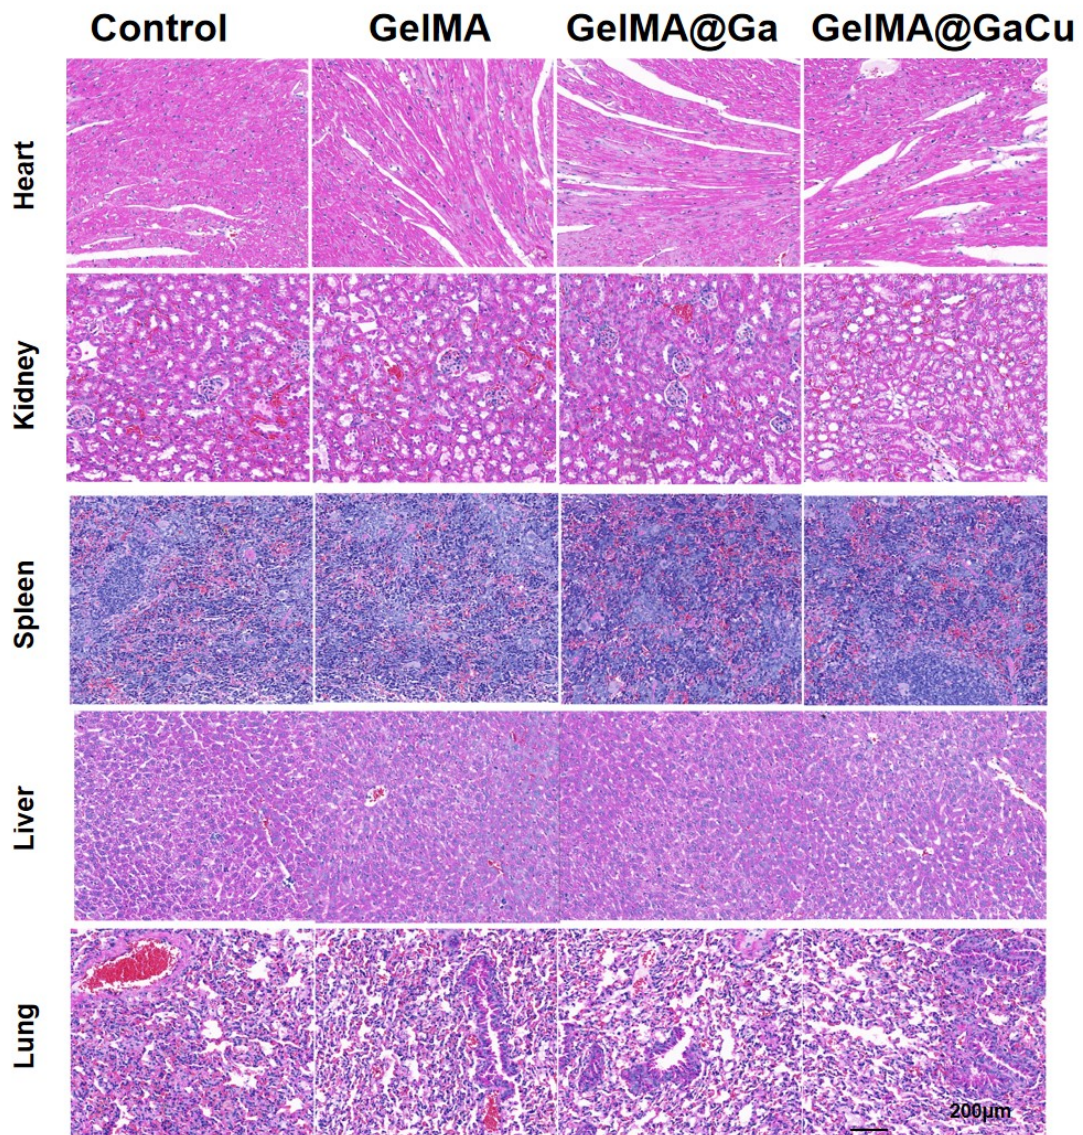

**Figure S1.** Tissue sections of the heart, liver, spleen, lung and kidney of mice were subjected to representative H&E staining.

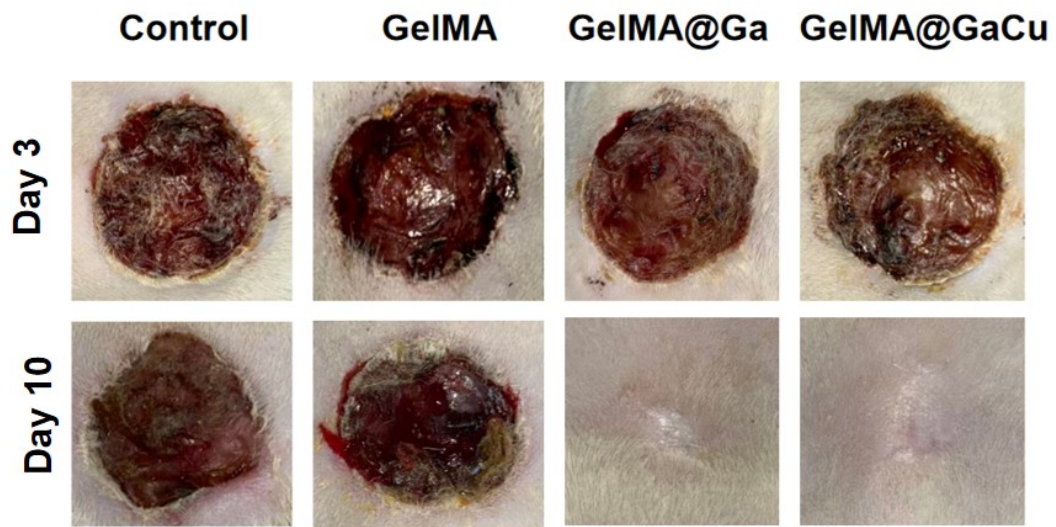

Figure S2. Images of mouse wounds on day 3 and day 10.

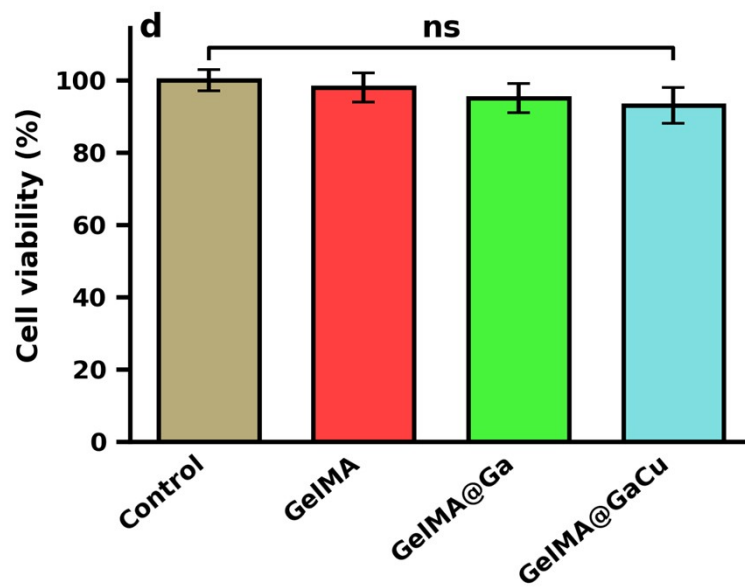

Figure S3. Cell viability of different hydrogel groups evaluated by CCK-8 assay. Data are presented as mean  $\pm$  SD (n = 3). ns, not significant.
